# Supplementary material for: Exploring the roles of oxygen species in H2 oxidation at β-MnO2 surfaces using operando DRIFTS-MS
Source: Springer Nature journal article supplement (doi:10.1038/s42004-022-00717-0), 2022-08-20
Supplement: MOESM1 [file 42004_2022_717_MOESM1_ESM.pdf]

## Supplementary Materials for

### **Exploring the roles of oxygen species in H<sub>2</sub> oxidation at $\beta$ -MnO<sub>2</sub> surfaces using operando DRIFTS-MS**

Jiacheng Xu<sup>1,2</sup>, Tiantian Zhang<sup>1</sup>, Shiyu Fang<sup>1</sup>, Jing Li<sup>1,3</sup>, Zuliang Wu<sup>1,3</sup>, Wei Wang<sup>1,3</sup>, Jiali Zhu<sup>1,3</sup>, Erhao Gao<sup>1,3</sup>, Shuiliang Yao<sup>1,2,3,\*</sup>

<sup>1</sup>School of Environmental and Safety Engineering, Changzhou University, Changzhou, China

<sup>2</sup>School of Material Science and Engineering, Changzhou University, Changzhou, China

<sup>3</sup>Advanced Plasma Catalysis Engineering Laboratory for China Petrochemical Industry, Changzhou, China

\* Corresponding author. Email: yaos@cczu.edu.cn

Figs. S1 to S7

Tables S1 to S3

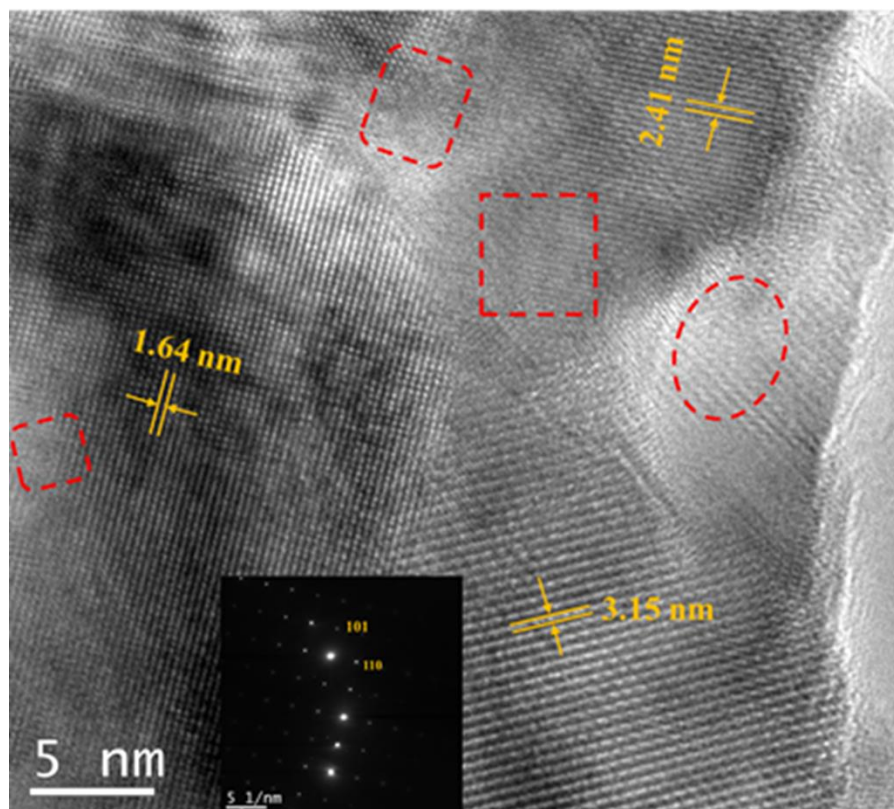

Fig. S1 HRTEM image of  $\beta$ -MnO<sub>2</sub>.

In order to confirm the position of M=O at  $\beta$ -MnO<sub>2</sub>, we have carried out the experiments of O<sub>3</sub> adsorption and decomposition on  $\beta$ -MnO<sub>2</sub>. We found a peak at 1300 cm<sup>-1</sup> becomes more and more obvious when increasing O<sub>3</sub> concentration (Fig. S2), indicating that M=O at 1300 cm<sup>-1</sup> does exist at the surface of  $\beta$ -MnO<sub>2</sub>.

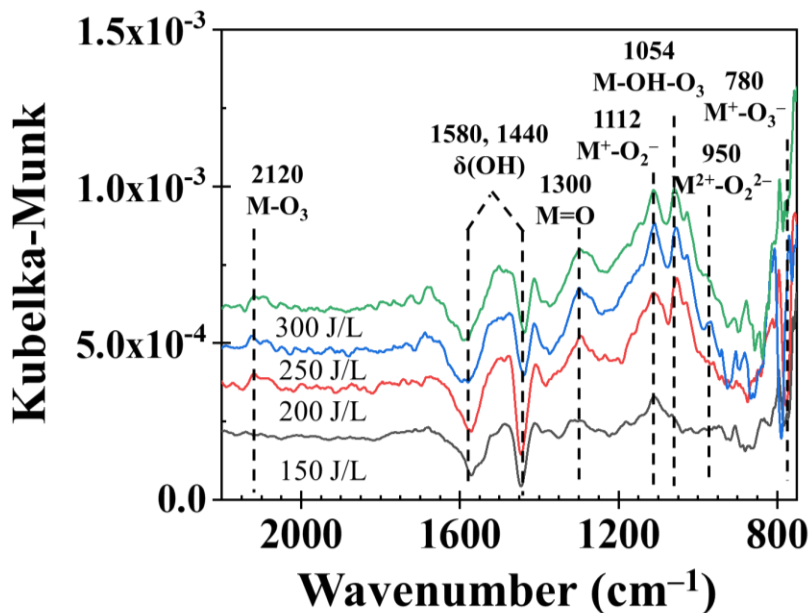

**Fig. S2 DRIFT spectra of oxygen groups at  $\beta$ -MnO<sub>2</sub> at surfaces at different energy densities.** Experimental conditions: 20vol.% O<sub>2</sub> and 80vol.% Ar, room temperature, O<sub>3</sub> concentration was changed by changing energy density (joules of electric energy per litter gas, J/L).

The DRIFTS spectra at various times under a fixed discharge condition or without discharges are shown in Fig. S3. As the discharge time increases, the peak height of M=O at 1300  $\text{cm}^{-1}$  gradually increases and finally stabilizes. When the discharge is stopped, the peak height of M=O is basically unchanged, indicating that M=O is a strong adsorbed oxygen species (chemical adsorption).

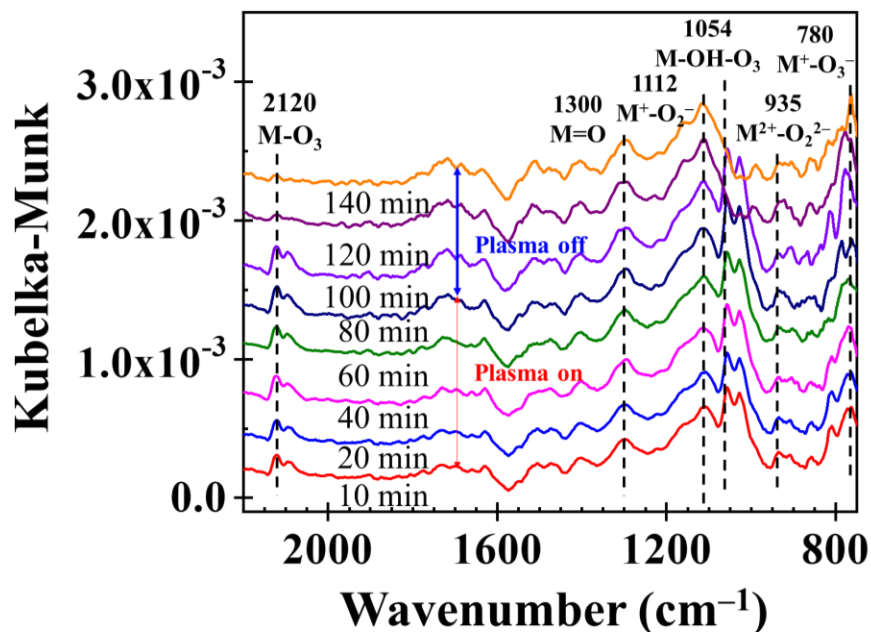

**Fig. S3 DRIFT spectra of  $\beta\text{-MnO}_2$  at different times with or without discharges (plasma on or off).**  
Experimental conditions: 20vol.% O<sub>2</sub> and 80vol.% Ar, room temperature.

In order to investigate the reactivity of M=O, O<sub>3</sub> gas mixed with H<sub>2</sub> gas was fed to β-MnO<sub>2</sub> at various temperatures. When the temperature increases, the peak height of M=O gradually decreases. When the temperature reaches 150 °C, the peak height of M = O is negative (Fig. S4). This result obviously shows that the M=O from O<sub>3</sub> decomposition can react with H<sub>2</sub>.

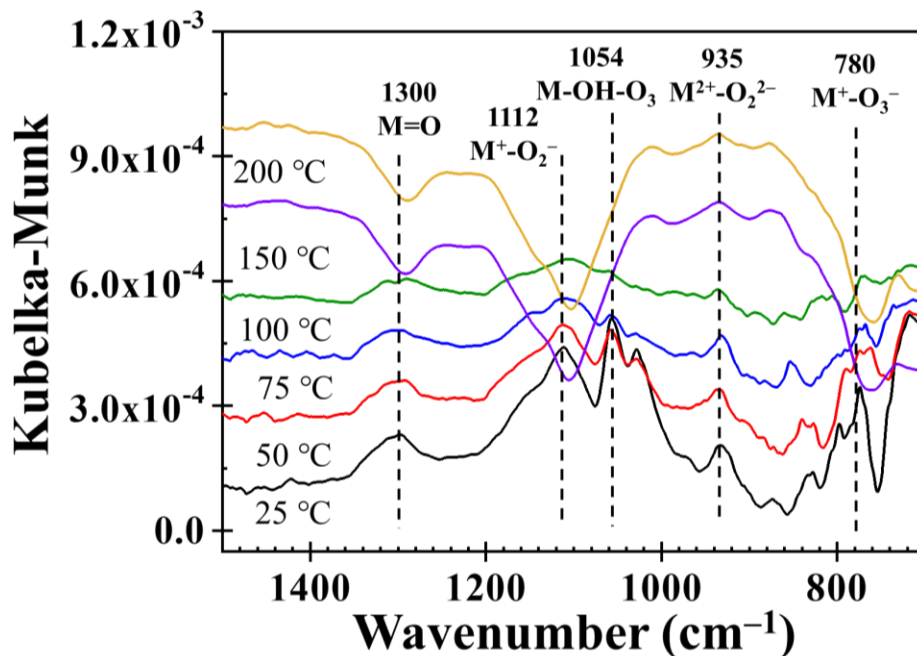

**Fig. S4 DRIFT spectra of β-MnO<sub>2</sub> at different temperatures and a fixed O<sub>3</sub> concentration.**  
Experimental conditions: H<sub>2</sub>: 2.37%, O<sub>2</sub>:10%, Ar: balance; temperature: 25-200 °C.

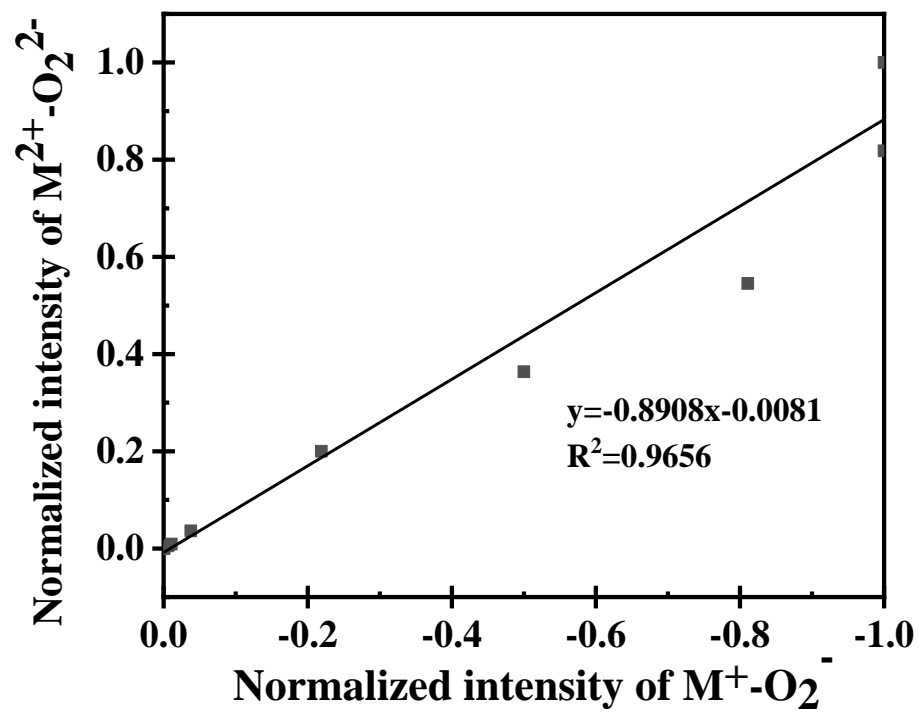

Fig. S5 Relation of normalized intensities of  $M^{2+}-O_2^{2-}$  and  $M^+-O_2^-$ .

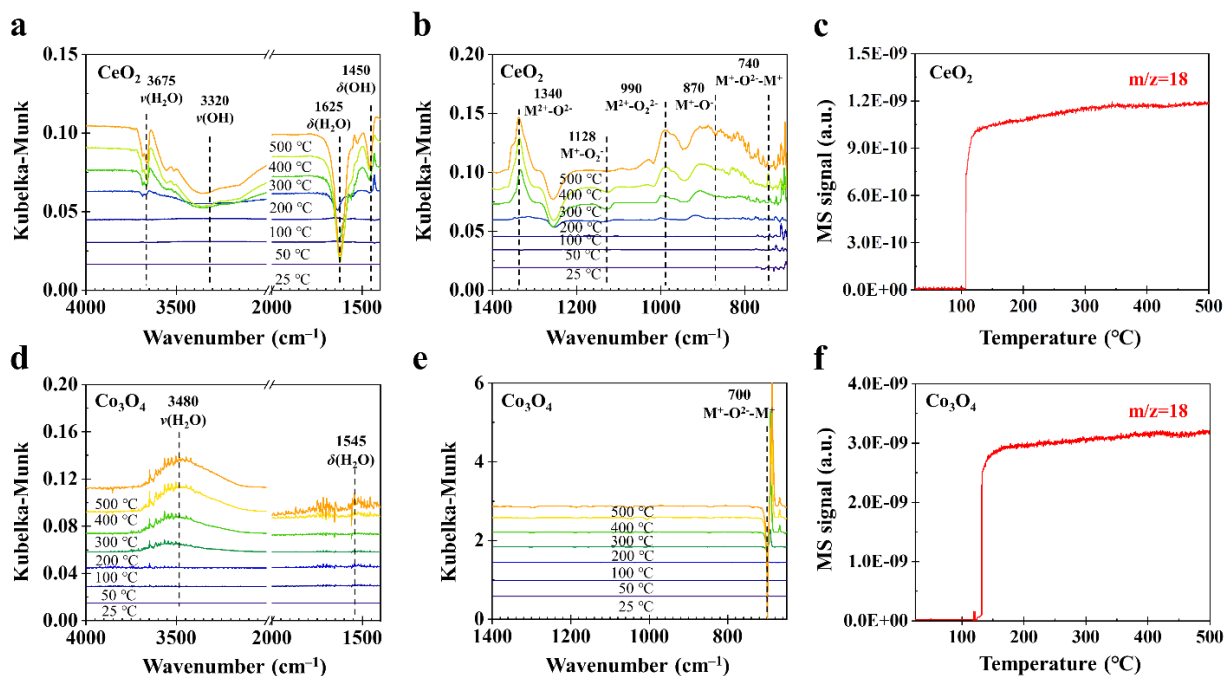

**Fig. S6 Operando DRIFT-MS profiles of metal oxides (a-c CeO<sub>2</sub> and d-f Co<sub>3</sub>O<sub>4</sub>).**

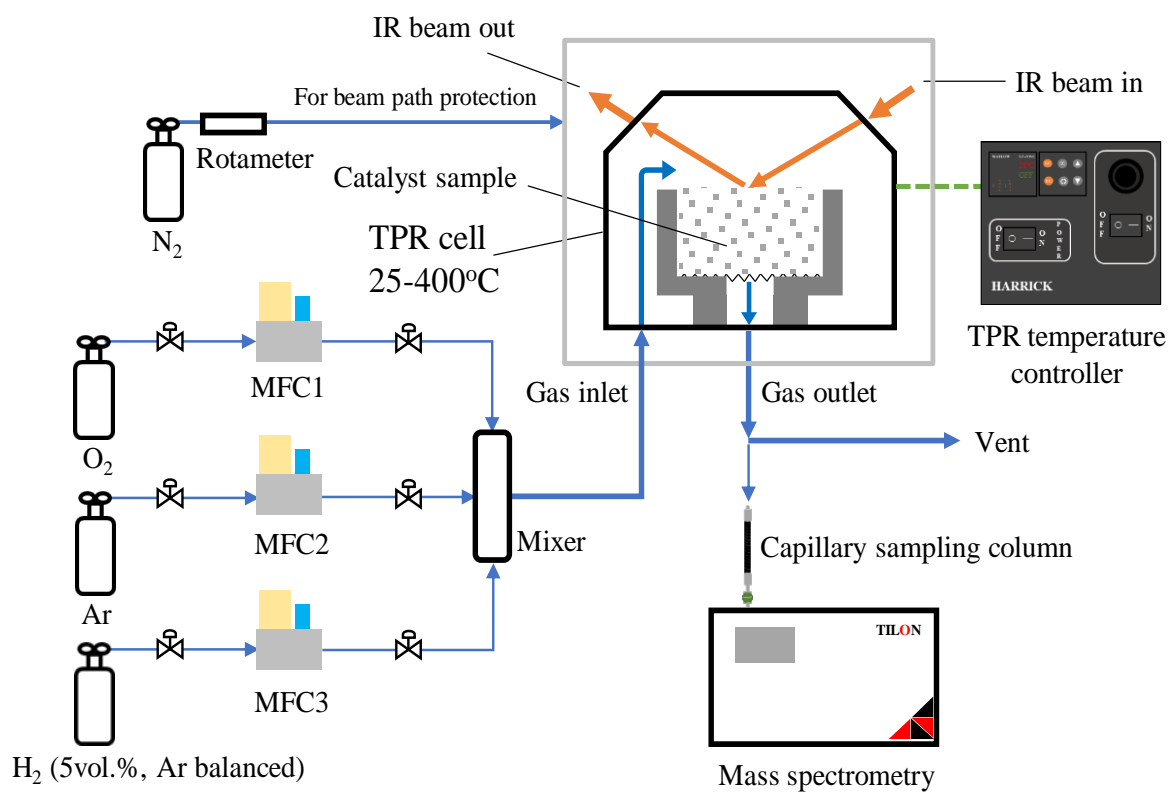

**Fig. S7 Experimental setup of operando TPR-FTIR-MS system.**



**Table S1 Advantages and disadvantages of analytical methods for oxygen species and oxygen vacancies <sup>1,2</sup>.**

| Method                                  | Advantage                                                                                                       | Disadvantage                                                        | Detection capacity                                                                                                                            |
|-----------------------------------------|-----------------------------------------------------------------------------------------------------------------|---------------------------------------------------------------------|-----------------------------------------------------------------------------------------------------------------------------------------------|
| IR, Raman                               | Distinguish between different types of oxygen species and semi-quantitative                                     | Short-lived species are difficult to measure                        | Different lattice configurations are distinguishable; surface species can also be differentiated                                              |
| O <sub>2</sub> -TPD/H <sub>2</sub> -TPR | Distinguish between surface and bulk species, semi-quantitative                                                 | Cannot distinguish between different surface species                | Distinguishes surface species from bulk                                                                                                       |
| EPR                                     | Substances containing unpaired electrons                                                                        | Can only capture paramagnetic species                               | O <sub>2</sub> <sup>2-</sup> , O <sub>2</sub> <sup>-</sup> , O <sup>-</sup> , and O <sub>3</sub> <sup>-</sup> are visible and distinguishable |
| DFT                                     | Not limited by experiment and detectable performance                                                            | Need to simplify invalid assumptions                                | All oxygen species are distinguishable from each other                                                                                        |
| MS                                      | Can measure the quantity of exchangeable oxygen and quantitative                                                | Cannot distinguish between different surface species                | Distinguishes surface species from bulk                                                                                                       |
| X-ray Techniques                        | Surface and bulk species can be distinguished, semi-quantitative                                                | Distinction between different oxygen species is difficult           | Distinguishes surface species from bulk                                                                                                       |
| Oxygen isotope                          | Determine which structure results in the conversion between easily exchangeable oxygen atoms and oxygen species | Different charged oxygen species cannot be distinguished            | Can identify different types of surface species and lattice oxygen                                                                            |
| TGA                                     | Can indirectly judge and characterize oxygen vacancies in the crystal lattice, semi-quantitative                | Cannot distinguish the type of reactive oxygen species              | Indirect study of oxygen vacancies in the catalyst lattice                                                                                    |
| STEM                                    | Can accurately qualitative oxygen vacancy                                                                       | Cannot distinguish the type of reactive oxygen species and quantify | Determine the presence of oxygen vacancies                                                                                                    |
| PALS                                    | Sensitive to atomic-scale defects (vacancies, dislocations)                                                     | Cannot distinguish the type of reactive oxygen species and quantify | Obtain the internal microstructure and defect structure of the condensed matter                                                               |

**Table S2 Composition of the gases fed to the TPR cell.**

| Gas atmosphere                 | Composition (%)                                          | Total gas flow rate (mL/min) |
|--------------------------------|----------------------------------------------------------|------------------------------|
| H <sub>2</sub> /Ar             | H <sub>2</sub> : 2.37%, Ar: balance                      | 38                           |
| H <sub>2</sub> +O <sub>2</sub> | H <sub>2</sub> : 2.37%, O <sub>2</sub> :10%, Ar: balance | 38                           |
| O <sub>2</sub> /Ar             | O <sub>2</sub> : 5.26%, Ar: balance                      | 38                           |
| Ar                             | Ar:100%                                                  | 20                           |

**Table S3 DRIFTS peaks and related functional groups.**

| Wavenumber (cm <sup>-1</sup> ) | Functional group                                        | Reference |
|--------------------------------|---------------------------------------------------------|-----------|
| 750-800                        | M <sup>+</sup> -O <sup>2-</sup> -M <sup>+</sup> , M-O-M | 3         |
| 1300-1400                      | M <sup>2+</sup> -O <sup>2-</sup> , M=O                  | 4-6       |
| 870                            | M <sup>+</sup> -O <sup>-</sup> , M-O                    | 7         |
| 1110-1120                      | M <sup>+</sup> -O <sub>2</sub> <sup>-</sup>             | 8, 9      |
| 930-960                        | M <sup>2+</sup> -O <sub>2</sub> <sup>2-</sup>           | 10        |
| 1520, 1610, 1640               | $\delta$ (H <sub>2</sub> O), M-OH <sub>2</sub>          | 11        |
| 3080, 3230, 3530, 3720         | $\nu$ (OH)                                              | 11, 12    |

**Supplementary references**

1. Ye, K., et al. An overview of advanced methods for the characterization of oxygen vacancies in materials. *Trend. Anal. Chem.* **116**, 102–108 (2019).
2. Williams, O. & Sievers, C. Active oxygen species in heterogeneously catalyzed oxidation reactions. *Appl. Catal. A-Gen.* **614**, 118057 (2021).
3. Panov, G., Dubkov, K. & Starokon, E. Active oxygen in selective oxidation catalysis. *Catal. Today* **117**, 148–155 (2006).
4. Wu, J., et al. In situ DRIFTS study of O<sub>3</sub> adsorption on CaO,  $\gamma$ -Al<sub>2</sub>O<sub>3</sub>, CuO,  $\alpha$ -Fe<sub>2</sub>O<sub>3</sub> and ZnO at room temperature for the catalytic ozonation of cinnamaldehyde. *Appl. Surf. Sci.* **412**, 290–305 (2017).
5. Brodu, N., et al. Role of Lewis acid sites of ZSM-5 zeolite on gaseous ozone abatement. *Chem. Eng. J.* **231**, 281–286 (2013).
6. Roscoe, J. & Abbatt, J. Diffuse Reflectance FTIR Study of the Interaction of Alumina Surfaces with Ozone and Water Vapor. *J. Phys. Chem. A.* **109**, 9028–9034 (2005).
7. Larson, V., et al. Iron and manganese oxo complexes, oxo wall and beyond. *Nature Rev. Chem.* **4**, 404 (2020).
8. Li, C., Domen, K., Maruya, K. Oxygen exchange reactions over cerium oxide: An FT-IR study. *J. Catal.* **123**, 436–442 (1990).
9. Jiang, S., et al. Insight into the reaction mechanism of CO<sub>2</sub> activation for CH<sub>4</sub> reforming over NiO-MgO: A combination of DRIFTS and DFT study. *Appl. Surf. Sci.* **416**, 59–68 (2017).
10. Luca, B., Alfonso, P., Maria, C. O<sub>2</sub> activation over Ag-decorated CeO<sub>2</sub>(111) and TiO<sub>2</sub>(110) surfaces: a theoretical comparative investigation. *J. Phys. Chem. C.* **124**, 25917–25930 (2020).

11. Theoklopprogge, J., et al. XPS study of the major minerals in bauxite: Gibbsite, bayerite and (pseudo-) boehmite. *J. Colloid. Interf. Sci.* **296(2)**, 572–576 (2006).
12. Gonzalez, P. & Calatayud, M. Toward an understanding of the hydrogenation reaction of MO<sub>2</sub> gas-phase clusters (M = Ti, Zr, and Hf). *J. Phys. Chem. C.* **117 (25)**, 5354–5364 (2013).
